# Supplementary material
Source: PubMed Central journal article supplement (PMC4567913)
Supplement: NIHMS694121-supplement-01.pdf [file NIHMS694121-supplement-01.pdf]

## Supporting information

### **Combined inhibition of MEK and PIK1 has synergistic anti-tumor activity in NRAS mutant melanoma**

Posch C<sup>1,2,3,†,\*</sup>, Cholewa BD<sup>4,†</sup>, Vujic I<sup>1,3</sup>, Sanlorenzo M<sup>1,5</sup>, Ma J<sup>1</sup>, Kim ST<sup>1</sup>, Kleffel S<sup>2</sup>, Schatton T<sup>2</sup>, Rappersberger K<sup>3</sup>, Gutteridge R<sup>4</sup>, Ahmad N<sup>4</sup>, Ortiz-Urda S<sup>1</sup>.

<sup>1</sup> University of California San Francisco, Department of Dermatology, Mt. Zion Cancer Research Center, 2340 Sutter Street N461, 94115 San Francisco – USA

<sup>2</sup> Brigham and Women's Hospital, Harvard Medical School, Department of Dermatology, 77 Avenue Louis Pasteur, 02115 Boston – USA

<sup>3</sup> The Rudolfstiftung Hospital, Academic Teaching Hospital, Medical University Vienna, Department of Dermatology, Juchgasse 25, 1030 Vienna – Austria

<sup>4</sup> University of Wisconsin, Department of Dermatology, 7418 Wisconsin Institutes for Medical Research, 1111 Highland Ave, Madison, WI 53705 – USA

<sup>5</sup> Department of Medical Sciences, Section of Dermatology, University of Turin – Italy

† Authors contributed equally.

\* To whom correspondence should be addressed.

## Supporting Material and Methods

### Cell Culture, RNA extraction

Human NRAS mutant melanoma cell lines WM3629, WM3060, WM1366 and WM3670 were obtained from the Coriell Institute; Cell lines CHP212 and SW1271 were purchased from ATCC; Cell lines D04, Sk-Mel-2, MM485, MM415, MaMel27II, MaMel30I, MM466, MM537, MaMel144aI, MM3211, Sk-Mel-5, Sk-Mel-28, AV1, AV2, AV5, C918, Mel202, OMM1.3, OMM1 were made available through Boris Bastian at the University of California San Francisco. The cell lines used in this study are known to harbor the mutations listed in table S1. No further authentication was performed. Cell lines D04, Sk-Mel-2, MM485, M415, MaMel27II, MaMel30I, MM466, MM537, MaMel144aI, WM3211, Sk-Mel-5, Sk-Mel-28, Mel202, OMM1.3, OMM1, CHP212 and SW1271 were maintained in RPMI 1640 media supplemented with 10% (vol/vol) fetal bovine serum (FBS). Cell lines WM3629, WM3670, WM3060, WM1366, WM8 were maintained in MCDB153 media supplemented with 20% (vol/vol) Leibovitz's L-15 media, 2% (vol/vol) FBS, and 1.68 mM CaCl<sub>2</sub>. Cell lines AV1, AV2, AV5 were grown in IMDM medium supplemented with 10% (vol/vol) FBS. All cell lines were incubated at 37°C under 5% CO<sub>2</sub>. Infant foreskin derived primary human melanocytes (PHM) were available in our cell repository and grown in M254 medium with HMGS supplements added as recommended by the manufacturer. Cell lines are recognized to harbor the mutations listed in table S1. For total RNA extraction cells were plated 24h prior to extraction, which was carried out using the Qiagen RNeasy (Qiagen, 74104) extraction kit following the manufacturer's recommendations including DNase treatment.

## qPCR

Total RNA extracts were reverse transcribed using the Quanta q-script cDNA synthesis kit according to the manufacturer's protocol. PCR primers were synthesized by Integrated DNA Technologies (Coralville, IA). Sequences are listed in Table S3. PCR was conducted in triplicate with 20 $\mu$ L reaction volumes of water, Power SYBR<sup>®</sup> Green, by Applied Biosystems with Rox as a passive reference, 5ng cDNA, and 0.9-0.15mM each primer depending on optimization of the primer set. Sample cDNA was added to the aliquoted SYBR Master Mix and water which was then aliquoted into a 384-well plate. A Non-Template control (NTC) and No-Reverse Transcriptase control (No-RT) were run in duplicate with 20 $\mu$ l reaction volumes. The primers and water were mixed together and added to the NTC, No-RT control, and the Master Mix, water, and cDNA samples in the 384-well plate. PCR was conducted on the ABI 7900HT (Applied Biosystems) using the following cycle parameters: 1 cycle of 95 $^{\circ}$  for 10 minutes, 40 cycles of 95 $^{\circ}$  for 15 seconds, 60 $^{\circ}$  for 1 minute, and 1 cycle of 95 $^{\circ}$  for 15 seconds, 60 $^{\circ}$  for 15 seconds, 95 $^{\circ}$  for 15 seconds. Analysis was carried out using the SDS software (version 2.3) supplied with the ABI 7900HT to determine the Ct values of each reaction. A dissociation curve was run after amplification to ensure the amplification of a single product. Ct-values were determined for three test and three reference reactions in each sample, averaged, and subtracted to obtain the  $\Delta$ Ct [ $\Delta$ Ct = Ct (test locus) – Ct (control locus)]. PCR efficiencies were measured for all custom assays and were greater than or equal to 90%. The relative fold difference was calculated for each primer/probe combination as  $2^{-\Delta$ Ct} x 100.

### Custom qPCR Array

RNA was isolated as previously described and integrity was verified using a nano chip assay on the Agilent Bioanalyzer. The transcription levels of a gene subset specific to MEK and Plk1 signaling pathways were assessed by a custom 384-well SYBR qPCR array (Bio-Rad, Cat #10025213) with 29 unique assays using ACTB and GAPDH as endogenous reference genes and all manufacturer recommended controls. Each unique assay was run in duplicate per plate and each cell line was run on two plates for a total of 4 replicates per unique assay. The array was ran on a Roche Lightcycler 480 according to manufacturer's protocol and the resultant data was analyzed using the  $2^{\Delta\Delta CT}$  method. The average of delta CT and deltadelta CT values are provided in table S5.

### Inhibitors, Viability assays, Caspase 3/7 assay, Combination Index Analysis

All inhibitors used in the study were purchased from Selleck Chemicals and ChemieTek. Viability assays were carried out at least in triplicates (incubation for 72h). The relative number of viable cells was assessed using CellTiter-Glo (Promega; G7570). Total luminescence was measured on the SynergyHT plate reader (BioTek) using Gen5 software (Version 1.11.5). Inhibitors were tested covering ranges from 2 – 64nM for the inhibitor JTP-74057 and 15 – 500nM for the inhibitor BI 6727. The concentration of drugs resulting in 50% growth inhibition (IC50) as well as the combination index (CI) determining synergistic effects of drugs in combination was calculated using CalcuSyn software (Biosoft, version 2.1). Synergy was defined following the recommendations of Chou-Talalay (Chou and Talalay 1984). Caspase 3/7 activity was determined by

Caspase-Glo® 3/7 Assay (Promega, G8090) following the manufacturer's instructions. Additionally, the Caspase-Glo® 3/7 Assay (Promega, G8090) was used to determine caspase 3/7 activity in protein extracts from xenograft tumor samples following the manufacturer's recommendations.

#### Lentiviral production and transduction

HEK 293T cells were passaged to be 30-40% confluent, then Cells were transfected using the CaPO<sub>4</sub> method. Briefly, 10µg shRNA plasmid DNA (nonsense shRNA or p53 targeting shRNA) (Sigma Aldrich, MO), 5µg VSV-G and 6µg Δ8.2 plasmids were mixed with sterile ddH<sub>2</sub>O to a final volume of 450µl and mixed with 50µl of 2.5 M CaCl<sub>2</sub>. The DNA mix was bubbled and 500µl 2X HBS (pH 7.05) added drop wise. The transfection mixture was added to its respective plates and incubated overnight. After 24 hours, transfection media was removed and fresh media added. After an additional 24 hours and 48 hours cell media containing shRNA lentivirus was collected and filtered for use. For target cell transduction, Sk-mel-2 cells were passaged to 40% confluency. The viral media was added to cells with 6µg/ml polybrene. After 24 hours of transduction, viral media was removed and fresh media was added. After an additional 24 hours, the media was removed and fresh media containing 2 µg/mL of puromycin was added for 48 hours. Puromycin selection media was refreshed every 48 hours for 4 days total. Following selection, colonies were chosen for subsequent stable line production. NRAS lentiviral transduction was achieved by first cloning the NRAS cDNA into the Gateway entry vector pENTR/D-topo. pENTR/D-topo-NRAS was subjected to site-directed mutagenesis to generate a variety of known NRAS mutants which were then validated

by Sanger sequencing. NRAS cDNAs in pENTR were cloned into the Gateway cloning-enabled destination vector gFG12. Green Fluorescent Protein (GFP) was co-expressed with the different transgenes and used as a transduction efficiency reporter. After lentiviral transduction, cells were grown for 2 weeks followed by cell sorting. Sorted cells displayed comparable NRAS expression levels measured by qPCR.

### Cell Cycle Analysis

$1 \times 10^5$  Sk-mel-2 cells were plated and grown in 6-well plates (TPP, CHE) and treated with JTP-74017, BI 6727 or vehicle control. Following treatment, cells were trypsinized for 5 minutes and transferred into 5 mL Falcon tubes containing cultured media. Samples were centrifuged at 1000 RPM for 2 minutes and the supernatant was aspirated prior to the cells being resuspended in ice-cold 100% ethanol added dropwise while gently vortexing. Samples were stored at  $-20^{\circ}\text{C}$  overnight prior to centrifugation and resuspension in 500  $\mu\text{L}$  propidium iodide (PI) buffer (PBS, 50  $\mu\text{g}/\text{mL}$  PI, 0.1 mg/mL RNase A, 0.05% Triton-X). Samples were incubated at  $37^{\circ}\text{C}$  for 40 minutes in dark and stored at  $4^{\circ}\text{C}$  until processed by flow cytometry in the FL-2A channel on the Accuri C6 Flow Cytometer (BD Biosciences, CA). Cell cycle histogram overlays were created with FlowJo software (Tree Star, OR) and analysis performed with ModFit LT software (Verity Software, ME).

### Cell Cycle Synchronization

Sk-mel-2 cells were plated and grown in 6-well plates (TPP, CHE) until ~40% confluency. For G1/S synchronization, cells were blocked with 2mM thymidine (Sigma,

MO) in MEM for 18 hours, rinsed with PBS and released into fresh MEM for 9 hours. Next, a second thymidine block was conducted for 17 hours. The cells were released from the second block into treated media containing MEKi (JTP-74017) = 20nM; Plk1i (BI 6727) = 100nM, the combination of both, or DMSO control. Following treatment, cells were collected at individual time points (1-24 hours) by trypsinization and processed for cell cycle analysis or protein collection. For G2/M synchronization, a thymidine-nocodazole block was performed following an analogous protocol with an initial thymidine block for 24 hours followed by a 3 hour release and a second block using 100ng/mL nocodazole (Sigma, MO) in MEM for 12 hours. Similarly, the cells were released into treatment and subsequently processed for cell cycle analysis or protein collection.

### Immunoblotting

Cells were plated in 6 well plates 24h prior to inhibitor treatment (MEKi (JTP-74017) = 20nM; Plk1i (BI 6727) = 100nM). Following inhibitor incubation for 6h or 24h as indicated, cells were washed with phosphate buffered saline (PBS) and lysed using radio-immunoprecipitation (RIPA) buffer [150 mM NaCl, 1% (vol/vol) Nonidet P-40, 0.5% (wt/vol) sodium deoxycholate, 0.1% (wt/vol) SDS] in 50 mM Tris-HCl (pH 8.0) supplemented with 1x protease and phosphatase inhibitors (78442; Pierce). Protein concentrations were determined using the BCA Protein Assay kit (23235; Pierce). Total protein in 1xLaemmli buffer with 10% 2-mercaptoethanol was separated by SDS/PAGE, transferred for 1 h to a PVDF membrane (IPVH00010; Millipore) by electro blotting with 20% (vol/vol) methanol, and blocked for 1 h in 5% (wt/vol) dry milk/Tris-buffered saline

(TBS)/0.1% (vol/vol) Tween-20. Membranes were incubated overnight at 4°C with primary antibodies following incubation with horseradish peroxidase-conjugated secondary antiserum for 1 h and developed using enhanced chemo-luminescence [32106 (Pierce) or 64 – 201BP (Millipore)].  $\beta$ -Actin protein expression served as a loading control. P-ERK (4370), p-AKT (4060), p-S6 (4857), Cyclin D1 (2926), Cyclin B1 (12231), Plk1 (4513), p-p53 (9284), p-Rb (8516), Bcl-2 (2872), BAX (2774), p21 (2947), and BIM (2933) were obtained from Cell Signaling Technology, MDM2 (sc-812) and cyclin E (sc-481) were purchased from Santa Cruz Biotechnology,  $\beta$ -Actin was purchased from Sigma Aldrich.

#### Image processing, statistical analyses

Relative protein expression levels were evaluated by measuring immunoblot band intensities using the image processing and analysis tool ImageJ (1.48v). Statistical significance was evaluated by using independent, two-tailed student's t-tests. Co-occurrence of NRAS and Plk1 genetic alterations was determined via cBioPortal analysis of both genes in the The Cancer Genome Atlas (TCGA) provisional data set for Skin Cutaneous Melanoma (477 samples) with consideration for mutation, putative copy-number alteration, and mRNA expression Z-score (threshold +/- 2.0) (Cerami et al. 2012; Gao et al. 2013).



### Mouse xenografts

A total of  $5-8 \times 10^6$  cells of each cell line was used for subcutaneous injection in CrTac:NCr-*Foxn1<sup>nu</sup>* mice. Tumor size was calculated using the equation for a triaxial ellipsoid. Inhibitor treatment was initiated when tumors reached a volume of 80-100mm<sup>3</sup>. Inhibitor concentrations for single and combination therapy used *in vivo* were 2mg/kg/day for JTP-74057 and 50mg/kg/week for BI 6727. Compounds were administered by oral gavage five times a week over a period of three weeks. Tumor size changes, body weight and clinical evaluations were carried out three times per week. All animal studies were approved by IACUC/LARC of the University of California San Francisco (AN086990).

## Supporting figures

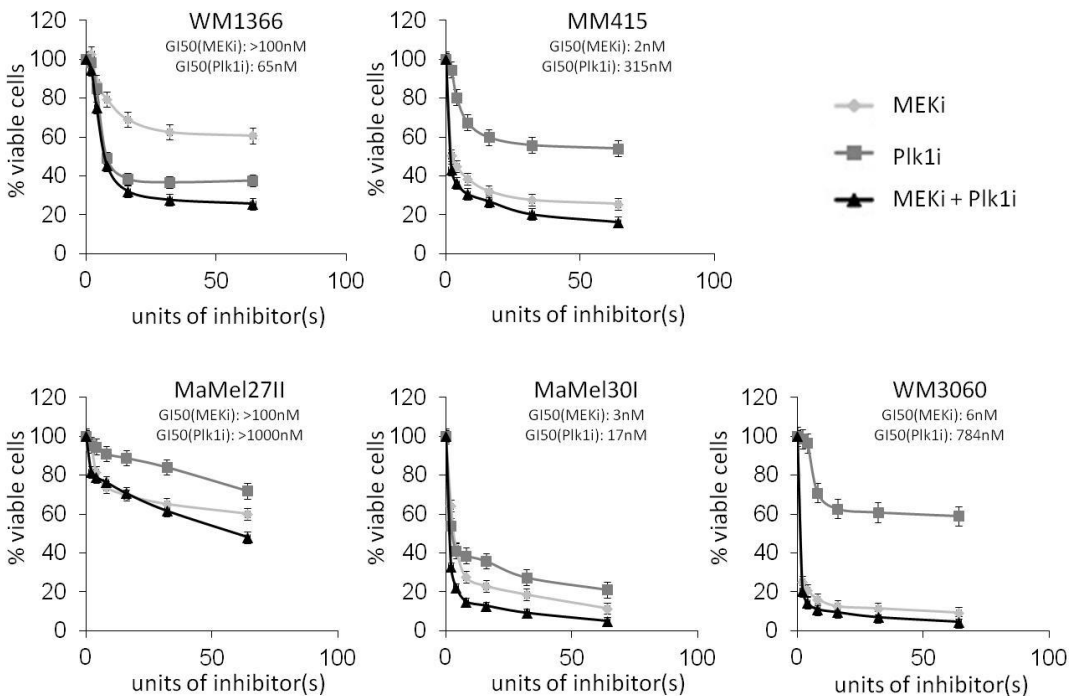

**Figure S1. Dose dependent reduction of cell viability with inhibitors of MEK and Plk1.** Dose response curves of 5 NRAS mutant melanoma cell lines. WM1366, MM415, MaMel27II, MaMel30I and WM3060 were incubated with inhibitors of MEK, Plk1 or their combination. Graphs showed a greater reduction of cell viability with the MEK/Plk1 combination compared to single inhibitor treatment (N=3, one unit of inhibitor represents 1nM of the MEK inhibitor JTP-74057 and 8nM for the Plk1 inhibitor BI 6727, N=3)

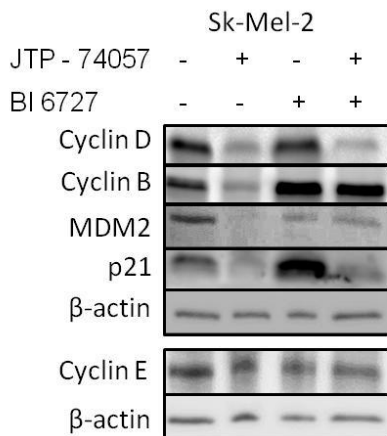

**Figure S2. Immunoblot analyses for cell cycle proteins in Sk-Mel-2 cells.** Western blot analysis of cell cycle regulators Cyclin D, B and E as well as analysis of p53 target protein p21 and MDM2 following 24h treatment with DMSO control, MEKi (JTP-74057, 20 nM), Plk1i (BI 6727, 100 nM), or Plk1i + MEKi.

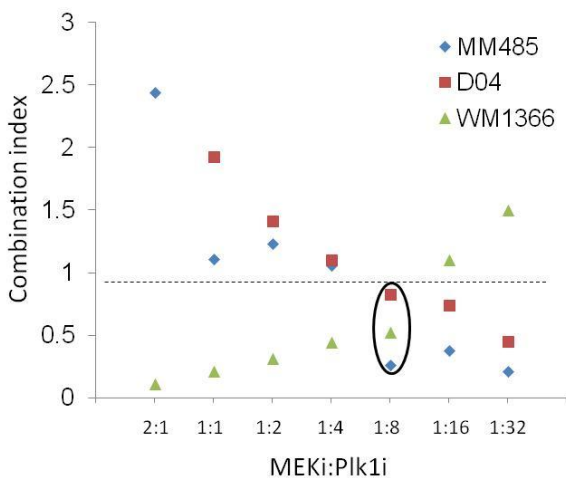

**Figure S3. Synergistic inhibition of NRAS mutant cells at a molar ratio of Mek:Plk1=1:8.** Combination Index (CI) for NRAS mutant cell lines MM485, D04 and WM1366 at different ratios of MEKi/Plk1i. All human, NRAS mutant melanoma cell lines were synergistically inhibited when a molar ratio of MEKi:Plk1i=1:8 was used (table S2).

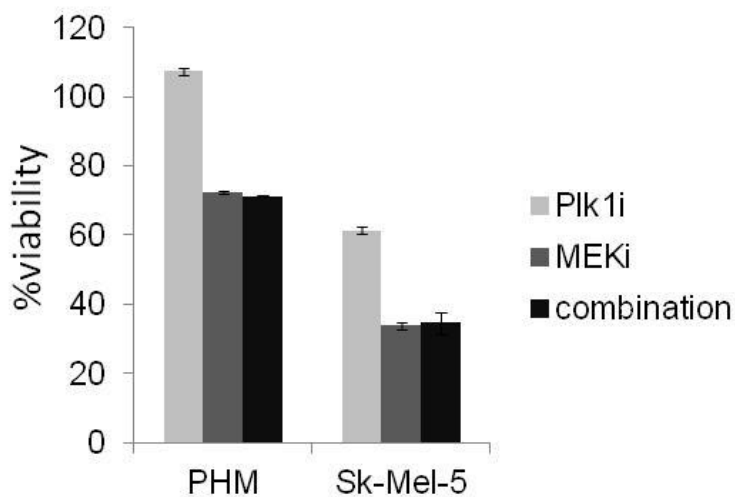

**Figure S4. No additional reduction of viability with the MEK/Plk1 combination in PHM and the BRAF(V600E) mutant cell line Sk-Mel-5 compared to MEKi treatment alone.** Relative viability of non-transformed human melanocytes and the BRAF(V600E) mutant melanoma cell line Sk-Mel-5 incubated with the MEKi (32nM), the Plk1i (256nM) or the combination of both inhibitors compared to vehicle treated controls. (N=3; error bars=SD)

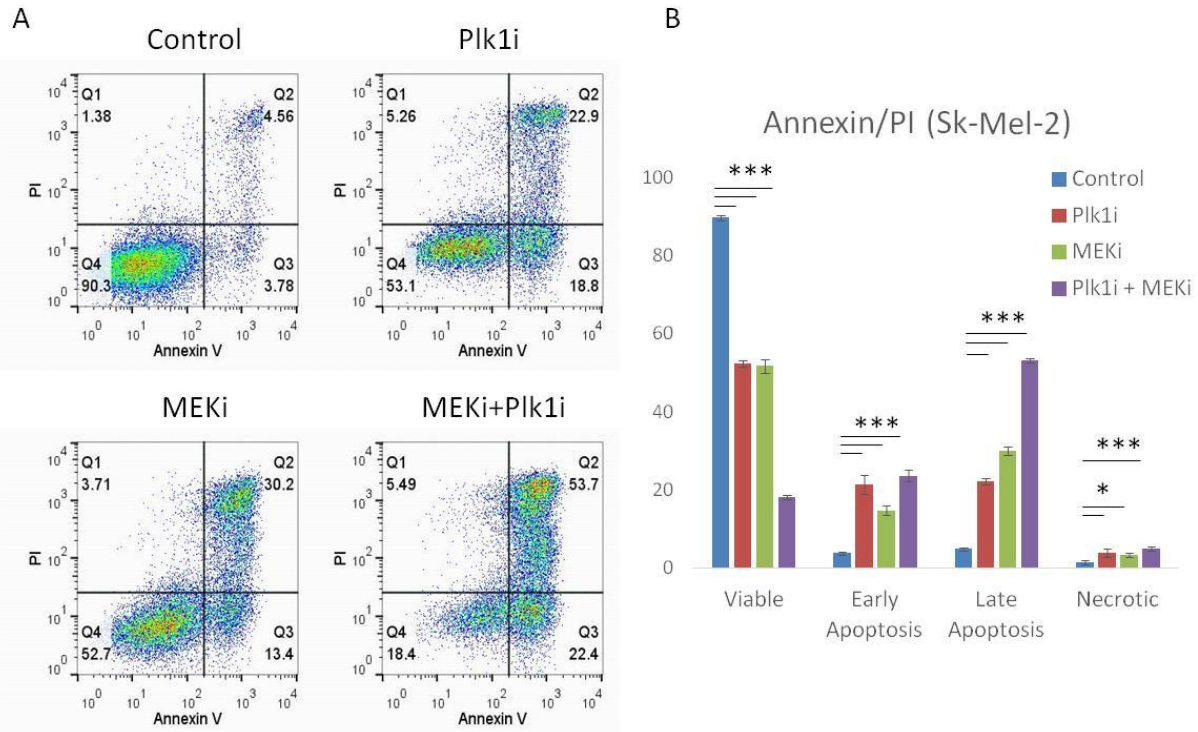

**Figure S5A. Induction of apoptosis in Sk-Mel-2 cells with the MEK/Plk1 combination.** Representative sample of flow cytometric analysis for Sk-Mel-2 cells stained with Annexin V and propidium iodide as markers for induction of apoptosis and cell death, respectively, following treatment with DMSO control, MEKi (JTP-74057, 20 nM), Plk1i (BI 6727, 100 nM), or Plk1i + MEKi. **S5B.** Mean value of individual flow cytometric analyses (N=3) representing viable (Q4), early apoptotic (Q3), late apoptotic (Q2), and necrotic (Q1) populations (\*\* $p < 0.001$ , \* $p < 0.05$ ).

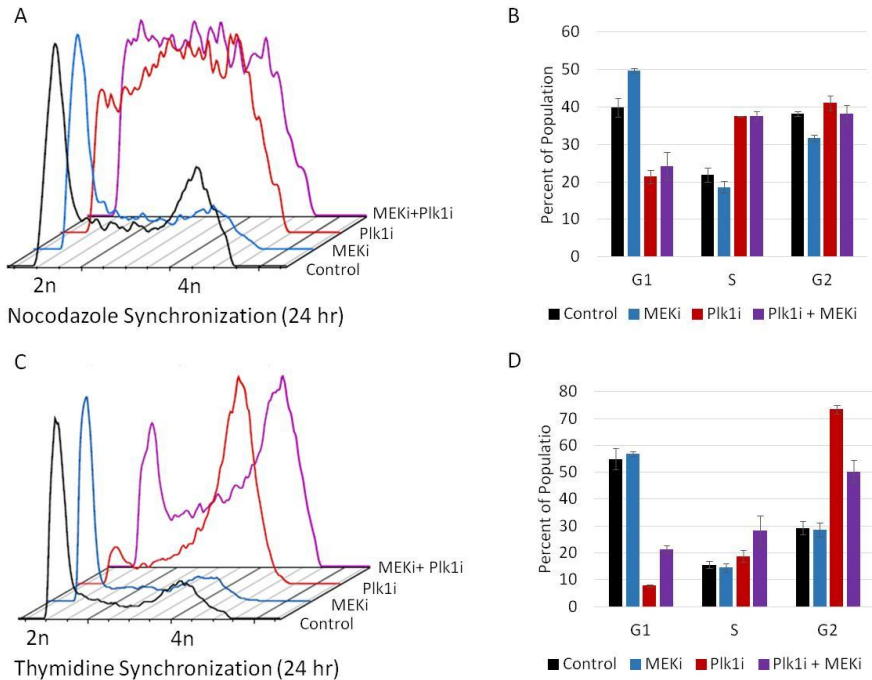

**Figure S6A. Cell cycle analyses of Sk-Mel-2 cells 24 hours after synchronization.** Overlaid histogram analysis of DNA content as determined by propidium iodide in Sk-mel-2 cells treated with DMSO control, MEKi (JTP-74057, 20 nM), Plk1i(BI 6727, 100 nM), or Plk1i + MEKi for 24 hours following G2/M synchronization via thymidine-nocodazole block. **S5B.** Mean value of individual flow cytometric analyses of the cell cycle following nocodazole synchronization. **S5C.** Overlaid histograms for Plk1i and MEKi treatments following late G1 synchronization via double thymidine block. **S6D.** Mean value of individual flow cytometric analyses of the cell cycle following thymidine synchronization.

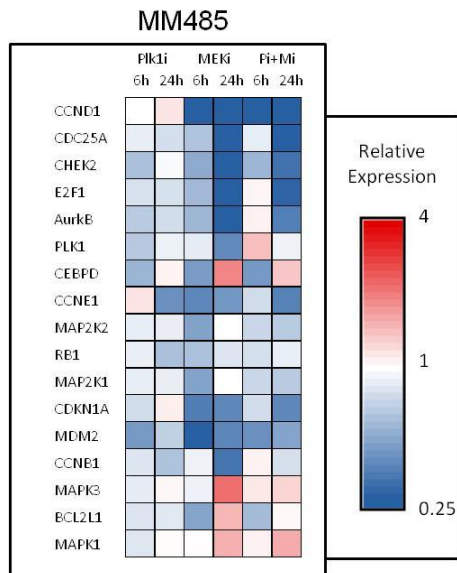

**Figure S7. Regulation of cell cycle genes, and p53/p21 signaling members with inhibitors of MEK and Plk1.** Reduction of MDM2, RB1, CCNE1 and induction of CCND1 and CDKN1A by Plk1 after 24h of inhibitor treatment. Reduction of CCND1, CDC25A, CHEK2, E2F1, AurkB, and CCNB1 as well as induction of CEBPD, MAPK3, BCL2L1, and MAPK1 after 24h of MEK inhibitor treatment. Dual inhibition with MEK/Plk1 showed less induction of CEBPD and MAPK3 compared to MEKi treatment alone. Additionally, MAP2K2 and MAP2K1 were reduced by the MEK/Plk1 combination compared to MEKi treatment alone after 24h of inhibitor treatment.

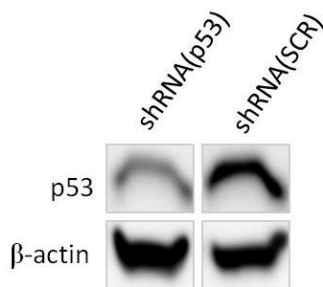

**Figure S8. Stable knockdown of p53 in Sk-Mel-2 cells.** Protein levels of p53 and  $\beta$ -actin in Sk-Mel-2 cells. All samples were analyzed on one and the same blot,  $\beta$ -actin served as a loading control.

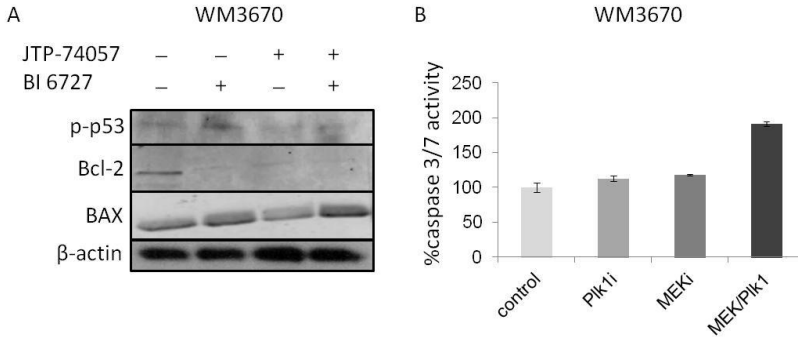

**Figure S9A. Induction of apoptosis in WM3670 mouse tumors with the MEK/Plk1 combination.** Immunoblot analyses of WM3670 mouse tumors indicating the induction of p-p53 with Plk1 inhibition, the induction of the pro-apoptotic marker BAX and the reduction of the anti-apoptotic marker Bcl-2 with the MEK/Plk1 combination. **S9B.** Caspase 3/7 activity in protein extracts from mouse xenografts treated with the indicated conditions.

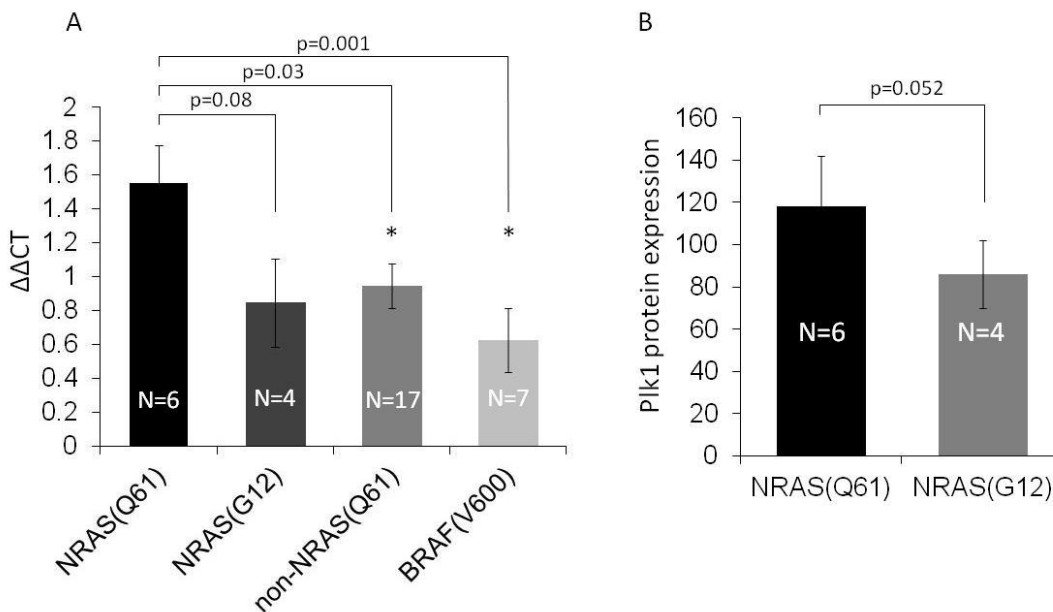

**Figure S10A. High Plk1 mRNA and protein levels in NRAS(Q61) mutant cells.** Plk1 mRNA expression in a collection of 23 human melanoma cell lines. **S10B.** Relative protein expression measured by the intensity of immunoblot bands compared to  $\beta$ -actin between 6 NRAS(Q61) and 4 NRAS(G12) mutant cell lines. (error bars=SD; \* indicates  $p < 0.05$ )

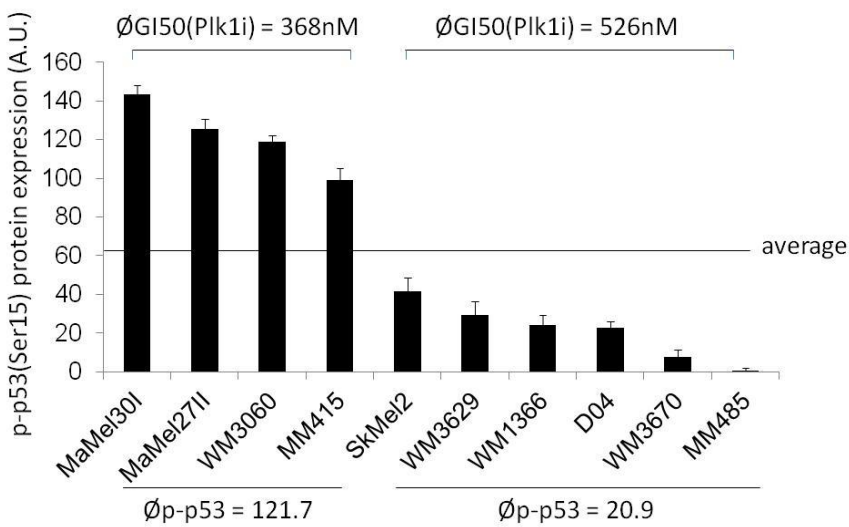

**Figure S11. NRAS mutant melanoma cells expressing high levels of p-p53 require less Plk1 inhibitor for equipotent growth inhibition.** Relative p-p53(Ser15) protein expression to  $\beta$ -actin controls in 10 NRAS mutant melanoma cell lines. There was a trend that cells with low p-p53(Ser15) protein expression require higher Plk1i concentrations to reach GI50 compared to cells with high p-p53(Ser15) expression. (Bars represent the average p-p53(Ser15) protein expression of the respective cell line (A.U.); error bars=SD; N=3)

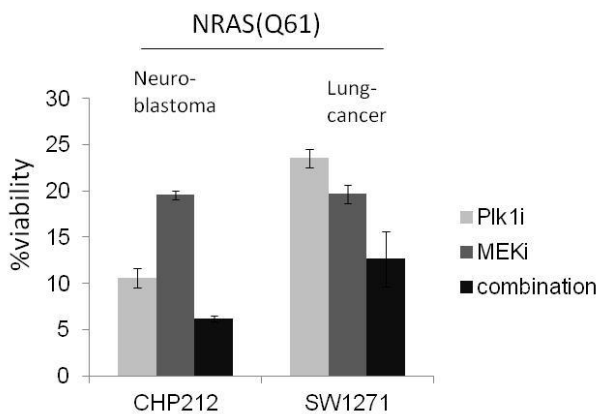

**Figure S12. The MEK/Plk1 combination effectively reduces cell viability in NRAS mutant neuroblastoma and lung cancers cells.** Relative viability of one NRAS mutant neuroblastoma (CHP212) and one NRAS mutant lung cancer (SW1271) cell line in response to Plk1i, MEKi or to the MEK/Plk1 inhibitor combination. (MEKi(JTP-74057)=32nM; Plk1i(BI 6727)=256nM; error bars=SD; N=3)



**Table S1.** Mutation status and relative expression of Plk1 of cell lines used in this study. (WT: wild type for BRAF, NRAS, C-KIT, GNAQ/GNA11, Plk1 hotspot mutations)

| Cell line    | mutation               | Plk1 (exon5,9) | CDKN2A            | $\Delta\Delta CT$ Plk1 |
|--------------|------------------------|----------------|-------------------|------------------------|
| D04          | NRAS(Q61L)             | WT             | homozyg. deletion | 1.312                  |
| MM415        | NRAS(Q61L)             | WT             | wild type         | 1.817                  |
| MM485        | NRAS(Q61R)             | WT             | mutant (W110Stop) | 2.310                  |
| WM1366       | NRAS(Q61L)             | WT             | partial deletion  | 0.830                  |
| Sk-Mel-2     | NRAS(Q61K)             | WT             | wild type         | 1.121                  |
| WM3060       | NRAS(Q61K)             | WT             | mutant            | 1.912                  |
| MaMel27II    | NRAS(G12D)             | WT             | wild type         | 1.417                  |
| MaMel30I     | NRAS(G13D) BRAF(D594N) | WT             | homozyg. Deletion | 0.179                  |
| WM3629       | NRAS(G12D) BRAF(D549G) | Plk1(C633T)    | wild type         | 1.027                  |
| WM3670       | NRAS(G12D) BRAF(G469E) | WT             | wild type         | 0.762                  |
| Ma-Mel-144aI | C-KIT(S476I)           | WT             | -                 | 1.600                  |
| WM3211       | C-KIT(L576P)           | -              | -                 | 1.777                  |
| Sk-Mel-5     | BRAF(V600E)            | WT             | -                 | 0.660                  |
| Sk-Mel-28    | BRAF(V600E)            | -              | -                 | 0.860                  |
| AV1          | BRAF(V600E)            | -              | -                 | 0.039                  |
| AV2          | BRAF(V600E)            | -              | -                 | 0.152                  |
| AV5          | BRAF(K601E)            | -              | -                 | 1.561                  |
| MM466        | BRAF(V600E)            | -              | -                 | 0.605                  |
| MM537        | BRAF(V600E)            | -              | -                 | 0.491                  |
| C918         | WT                     | -              | -                 | 0.871                  |
| Mel202       | GNAQ(Q209L)            | -              | -                 | 1.226                  |
| OMM1.3       | GNAQ(Q209P)            | WT             | -                 | 1.452                  |
| OMM1         | GNA11(Q209L)           | WT             | -                 | 1.416                  |
| PHM(E)       | WT                     | -              | -                 | 0.304                  |
| PHM(G12)     | NRAS(G12V)             | -              | -                 | 0.187                  |
| PHM(N24)     | NRAS(N24I)             | -              | -                 | 0.274                  |
| PHM(Q61)     | NRAS(Q61L)             | -              | -                 | 0.504                  |
| CHP212       | NRAS(Q61K)             | WT             | -                 | -                      |
| SW1271       | NRAS(Q61R)             | WT             | -                 | -                      |

**Table S2.** Concentration for 50% of maximal inhibition of cell proliferation (GI50), dose reduction index (DRI) and combination index (CI) for 10 NRAS mutant melanoma cell lines at a ratio of MEKi:PLK1i = 1:8. (N=3)

| Cell line | MEKi<br>JTP-74057 | Plk1i<br>BI 6727 | DRI(MEKi)<br>JTP-74057 | DRI(Plk1i)<br>BI 6727 | CI value at<br>FA50 | p-value |
|-----------|-------------------|------------------|------------------------|-----------------------|---------------------|---------|
| D04       | 1nM               | 29nM             | 1.63                   | 4.64                  | 0.83                | 0.001   |
| MM415     | 2nM               | 315nM            | 2.04                   | 39.82                 | 0.52                | 0.003   |
| MM485     | 4nM               | >1000nM          | 3.94                   | 166.97                | 0.26                | 0.013   |
| WM1366    | >100nM            | 65nM             | 61.35                  | 1.92                  | 0.54                | 0.045   |
| Sk-Mel-2  | 19nM              | 58nM             | 10.03                  | 3.91                  | 0.38                | 0.023   |
| WM3060    | 6nM               | 784nM            | 20.81                  | 153.19                | 0.01                | 0.001   |
| MaMel27II | >100nM            | >1000nM          | 2.75                   | 5.29                  | 0.55                | 0.011   |
| MaMel30I  | 3nM               | 17nM             | 5.60                   | 3.91                  | 0.43                | 0.012   |
| WM3629    | 7nM               | 292nM            | 2.51                   | 13.02                 | 0.48                | 0.004   |
| WM3670    | 78nM              | >1000nM          | 3.13                   | 7.40                  | 0.45                | 0.008   |

**Table S3.** Interpretation of CI values following the recommendations of Chou-Talalay (Chou and Talalay 1984).

| Range of CI | Symbol | Description            |
|-------------|--------|------------------------|
| <0.1        | +++++  | Very strong synergism  |
| 0.1-0.3     | ++++   | Strong synergism       |
| 0.3-0.7     | +++    | Synergism              |
| 0.7-0.85    | ++     | Moderate synergism     |
| 0.85-0.9    | +      | Slight synergism       |
| 0.9-1.1     | +/-    | Nearly additive        |
| 1.1-1.2     | -      | Slight antagonism      |
| 1.2-1.45    | --     | Moderate antagonism    |
| 1.45-3.3    | ---    | Antagonism             |
| 3.3-10      | ----   | Strong antagonism      |
| >10         | -----  | Very strong antagonism |

**Table S4.** qPCR primer sequences for Plk1 and  $\beta$ -actin detailed from 5' to 3'.

| target         | forward               | reverse              |
|----------------|-----------------------|----------------------|
| PLK1           | CCCCTCACAGTCCTCAATAA  | AATAGTCCACCCACTTGCTG |
| $\beta$ -actin | TACGCCAACACAGTGCTGTCT | GCCGATCCACACGGAGTACT |

**Table S5.** Delta CT and deltadelta CT values of the custom mRNA array at the indicated time points for the respective cell lines. Values represent the average of 4 replicates.

MM485 – 6h incubation

| $\Delta$ ct | Control | MEKi   | Plki   | MEKi + Plki | $2^{-\Delta\Delta ct}$ | MEKi  | Plki  | MEKi + Plki |
|-------------|---------|--------|--------|-------------|------------------------|-------|-------|-------------|
| AurkB       | 6.378   | 6.975  | 6.781  | 6.152       | AurkB                  | 0.661 | 0.757 | 1.170       |
| CCNB1       | 4.548   | 4.630  | 4.721  | 4.335       | CCNB1                  | 0.945 | 0.887 | 1.160       |
| CCND1       | 3.963   | 6.640  | 3.956  | 6.221       | CCND1                  | 0.156 | 1.005 | 0.209       |
| CCNE1       | 8.477   | 9.655  | 8.078  | 8.722       | CCNE1                  | 0.442 | 1.318 | 0.844       |
| CDKN1A      | 8.823   | 10.170 | 9.072  | 9.071       | CDKN1A                 | 0.393 | 0.842 | 0.843       |
| E2F1        | 7.493   | 8.059  | 7.705  | 7.344       | E2F1                   | 0.676 | 0.864 | 1.109       |
| MAP2K1      | 5.617   | 6.119  | 5.618  | 5.834       | MAP2K1                 | 0.706 | 0.999 | 0.860       |
| MAP2K2      | 4.070   | 4.888  | 4.188  | 4.370       | MAP2K2                 | 0.567 | 0.921 | 0.812       |
| MAPK1       | 4.926   | 4.889  | 5.092  | 4.700       | MAPK1                  | 1.026 | 0.891 | 1.170       |
| MAPK3       | 6.223   | 6.309  | 6.348  | 5.877       | MAPK3                  | 0.943 | 0.917 | 1.271       |
| MDM2        | 6.706   | 8.882  | 7.628  | 7.755       | MDM2                   | 0.221 | 0.528 | 0.483       |
| PLK1        | 7.626   | 7.758  | 8.046  | 6.807       | PLK1                   | 0.913 | 0.747 | 1.764       |
| RB1         | 5.477   | 5.963  | 5.588  | 5.701       | RB1                    | 0.714 | 0.926 | 0.856       |
| CEBPD       | 7.970   | 8.865  | 8.583  | 8.907       | CEBPD                  | 0.538 | 0.654 | 0.522       |
| CDC25A      | 7.381   | 7.850  | 7.495  | 7.501       | CDC25A                 | 0.722 | 0.924 | 0.920       |
| CHEK2       | 9.967   | 10.688 | 10.471 | 10.567      | CHEK2                  | 0.607 | 0.705 | 0.660       |
| BCL2L1      | 6.923   | 7.718  | 7.111  | 7.470       | BCL2L1                 | 0.577 | 0.878 | 0.685       |

MM485 – 24h incubation

| $\Delta$ ct | Control | MEKi  | Plki  | MEKi + Plki | $2^{-\Delta\Delta ct}$ | MEKi  | Plki  | MEKi + Plki |
|-------------|---------|-------|-------|-------------|------------------------|-------|-------|-------------|
| AurkB       | 6.128   | 8.987 | 6.376 | 7.444       | AurkB                  | 0.138 | 0.843 | 0.402       |
| CCNB1       | 4.424   | 5.911 | 4.903 | 4.647       | CCNB1                  | 0.357 | 0.718 | 0.857       |
| CCND1       | 4.444   | 8.696 | 4.052 | 8.804       | CCND1                  | 0.052 | 1.312 | 0.049       |

|        |        |        |        |        |        |       |       |       |
|--------|--------|--------|--------|--------|--------|-------|-------|-------|
| CCNE1  | 8.048  | 9.000  | 9.099  | 9.305  | CCNE1  | 0.517 | 0.483 | 0.418 |
| CDKN1A | 10.151 | 11.317 | 9.889  | 11.328 | CDKN1A | 0.446 | 1.199 | 0.442 |
| E2F1   | 8.148  | 10.947 | 8.366  | 10.008 | E2F1   | 0.144 | 0.860 | 0.275 |
| MAP2K1 | 5.648  | 6.020  | 5.472  | 6.229  | MAP2K1 | 0.772 | 1.129 | 0.668 |
| MAP2K2 | 4.054  | 4.051  | 4.169  | 4.452  | MAP2K2 | 1.002 | 0.924 | 0.759 |
| MAPK1  | 5.003  | 4.053  | 4.952  | 4.019  | MAPK1  | 1.932 | 1.036 | 1.978 |
| MAPK3  | 6.278  | 4.841  | 6.136  | 5.682  | MAPK3  | 2.708 | 1.104 | 1.512 |
| MDM2   | 7.588  | 8.787  | 7.941  | 8.395  | MDM2   | 0.436 | 0.783 | 0.572 |
| PLK1   | 8.436  | 9.573  | 8.526  | 8.514  | PLK1   | 0.455 | 0.940 | 0.947 |
| RB1    | 5.501  | 5.677  | 6.006  | 5.612  | RB1    | 0.885 | 0.705 | 0.926 |
| CEBPD  | 8.181  | 6.900  | 8.002  | 7.442  | CEBPD  | 2.430 | 1.132 | 1.669 |
| CDC25A | 7.396  | 10.657 | 7.626  | 9.482  | CDC25A | 0.104 | 0.853 | 0.236 |
| CHEK2  | 10.141 | 12.491 | 10.172 | 11.679 | CHEK2  | 0.196 | 0.978 | 0.344 |
| BCL2L1 | 6.948  | 6.057  | 7.106  | 6.824  | BCL2L1 | 1.854 | 0.896 | 1.089 |

## D04 – 6h incubation

| $\Delta$ ct | Control | MEKi  | Plki  | MEKi + Plki | $2^{-\Delta\Delta ct}$ | MEKi  | Plki  | MEKi + Plki |
|-------------|---------|-------|-------|-------------|------------------------|-------|-------|-------------|
| AurkB       | 6.987   | 7.131 | 7.405 | 6.708       | AurkB                  | 0.905 | 0.749 | 1.214       |
| CCNB1       | 3.805   | 3.694 | 3.532 | 4.020       | CCNB1                  | 1.080 | 1.208 | 0.862       |
| CCND1       | 5.857   | 7.646 | 6.102 | 7.213       | CCND1                  | 0.289 | 0.844 | 0.391       |
| CCNE1       | 7.500   | 7.356 | 6.927 | 7.498       | CCNE1                  | 1.105 | 1.487 | 1.001       |
| CDKN1A      | 8.912   | 8.469 | 8.917 | 7.768       | CDKN1A                 | 1.360 | 0.996 | 2.211       |
| E2F1        | 7.632   | 7.391 | 7.605 | 7.723       | E2F1                   | 1.182 | 1.019 | 0.939       |
| MAP2K1      | 5.982   | 6.036 | 6.012 | 5.945       | MAP2K1                 | 0.963 | 0.979 | 1.026       |
| MAP2K2      | 5.150   | 5.091 | 5.222 | 4.725       | MAP2K2                 | 1.041 | 0.951 | 1.342       |
| MAPK1       | 4.525   | 4.229 | 4.480 | 4.285       | MAPK1                  | 1.228 | 1.032 | 1.181       |
| MAPK3       | 7.412   | 7.009 | 6.889 | 6.678       | MAPK3                  | 1.323 | 1.437 | 1.664       |

|        |        |        |        |       |        |       |       |       |
|--------|--------|--------|--------|-------|--------|-------|-------|-------|
| MDM2   | 6.695  | 7.156  | 7.142  | 6.755 | MDM2   | 0.726 | 0.733 | 0.959 |
| PLK1   | 9.800  | 10.226 | 10.195 | 8.873 | PLK1   | 0.744 | 0.760 | 1.901 |
| RB1    | 6.760  | 6.759  | 6.687  | 6.950 | RB1    | 1.001 | 1.051 | 0.876 |
| CEBPD  | 5.275  | 5.684  | 5.672  | 6.098 | CEBPD  | 0.753 | 0.759 | 0.565 |
| CDC25A | 7.500  | 8.151  | 7.845  | 8.118 | CDC25A | 0.637 | 0.787 | 0.652 |
| CHEK2  | 10.780 | 9.919  | 10.495 | 9.918 | CHEK2  | 1.816 | 1.218 | 1.818 |
| BCL2L1 | 5.877  | 6.151  | 5.982  | 6.471 | BCL2L1 | 0.827 | 0.930 | 0.663 |

## D04 – 24h incubation

| $\Delta$ ct | Control | MEKi   | Plki  | MEKi + Plki | $2^{-\Delta\Delta ct}$ | MEKi  | Plki  | MEKi + Plki |
|-------------|---------|--------|-------|-------------|------------------------|-------|-------|-------------|
| AurkB       | 6.104   | 7.617  | 7.024 | 7.157       | AurkB                  | 0.350 | 0.528 | 0.482       |
| CCNB1       | 3.904   | 4.931  | 3.807 | 3.707       | CCNB1                  | 0.491 | 1.069 | 1.146       |
| CCND1       | 6.061   | 6.104  | 5.420 | 6.278       | CCND1                  | 0.971 | 1.560 | 0.860       |
| CCNE1       | 6.816   | 7.486  | 7.297 | 7.385       | CCNE1                  | 0.629 | 0.717 | 0.674       |
| CDKN1A      | 7.716   | 6.697  | 6.635 | 6.355       | CDKN1A                 | 2.027 | 2.117 | 2.570       |
| E2F1        | 6.709   | 8.536  | 7.682 | 7.987       | E2F1                   | 0.282 | 0.509 | 0.412       |
| MAP2K1      | 5.714   | 5.941  | 5.677 | 5.782       | MAP2K1                 | 0.854 | 1.026 | 0.954       |
| MAP2K2      | 4.729   | 5.066  | 4.877 | 4.827       | MAP2K2                 | 0.792 | 0.902 | 0.934       |
| MAPK1       | 4.266   | 3.511  | 4.515 | 3.757       | MAPK1                  | 1.688 | 0.842 | 1.423       |
| MAPK3       | 6.356   | 5.084  | 6.477 | 5.827       | MAPK3                  | 2.416 | 0.920 | 1.443       |
| MDM2        | 6.629   | 6.204  | 6.077 | 5.852       | MDM2                   | 1.342 | 1.466 | 1.713       |
| PLK1        | 9.666   | 11.156 | 9.917 | 10.135      | PLK1                   | 0.356 | 0.841 | 0.723       |
| RB1         | 6.354   | 6.196  | 6.945 | 6.485       | RB1                    | 1.116 | 0.664 | 0.913       |
| CEBPD       | 5.174   | 3.471  | 5.217 | 4.640       | CEBPD                  | 3.255 | 0.971 | 1.448       |
| CDC25A      | 7.036   | 9.019  | 8.050 | 8.982       | CDC25A                 | 0.253 | 0.495 | 0.260       |
| CHEK2       | 8.919   | 10.000 | 9.855 | 10.155      | CHEK2                  | 0.473 | 0.523 | 0.425       |
| BCL2L1      | 6.234   | 5.229  | 6.047 | 5.727       | BCL2L1                 | 2.007 | 1.138 | 1.421       |

## Sk-Mel-2 – 6h incubation

| $\Delta ct$ | Control | MEKi   | Plki   | MEKi + Plki | $2^{-\Delta\Delta ct}$ | MEKi  | Plki  | MEKi + Plki |
|-------------|---------|--------|--------|-------------|------------------------|-------|-------|-------------|
| AurkB       | 6.656   | 7.050  | 6.513  | 6.162       | AurkB                  | 0.761 | 1.104 | 1.409       |
| CCNB1       | 4.436   | 3.878  | 3.785  | 3.742       | CCNB1                  | 1.472 | 1.570 | 1.618       |
| CCND1       | 4.378   | 5.855  | 3.614  | 5.672       | CCND1                  | 0.359 | 1.698 | 0.408       |
| CCNE1       | 9.049   | 9.438  | 8.230  | 8.512       | CCNE1                  | 0.763 | 1.763 | 1.451       |
| CDKN1A      | 6.429   | 10.276 | 6.518  | 5.557       | CDKN1A                 | 0.069 | 0.940 | 1.830       |
| E2F1        | 7.739   | 7.660  | 7.148  | 7.374       | E2F1                   | 1.056 | 1.506 | 1.287       |
| MAP2K1      | 5.309   | 5.575  | 5.315  | 5.492       | MAP2K1                 | 0.832 | 0.995 | 0.881       |
| MAP2K2      | 4.586   | 4.975  | 4.498  | 4.457       | MAP2K2                 | 0.764 | 1.063 | 1.094       |
| MAPK1       | 3.714   | 3.128  | 3.663  | 3.034       | MAPK1                  | 1.500 | 1.036 | 1.601       |
| MAPK3       | 7.456   | 6.875  | 6.955  | 6.592       | MAPK3                  | 1.496 | 1.415 | 1.821       |
| MDM2        | 5.091   | 7.849  | 5.518  | 5.849       | MDM2                   | 0.148 | 0.744 | 0.591       |
| PLK1        | 10.301  | 11.519 | 10.220 | 9.349       | PLK1                   | 0.430 | 1.058 | 1.934       |
| RB1         | 6.979   | 7.423  | 7.153  | 6.922       | RB1                    | 0.735 | 0.886 | 1.040       |
| CEBPD       | 6.081   | 6.680  | 6.065  | 6.582       | CEBPD                  | 0.660 | 1.011 | 0.707       |
| CDC25A      | 8.185   | 10.870 | 10.160 | 9.334       | CDC25A                 | 0.156 | 0.254 | 0.451       |
| CHEK2       | 9.949   | 17.376 | 8.509  | 9.129       | CHEK2                  | 0.006 | 2.713 | 1.765       |
| BCL2L1      | 5.909   | 5.588  | 6.113  | 5.917       | BCL2L1                 | 1.248 | 0.868 | 0.994       |

## Sk-Mel-2 – 24h incubation

| $\Delta ct$ | Control | MEKi  | Plki  | MEKi + Plki | $2^{-\Delta\Delta ct}$ | MEKi  | Plki  | MEKi + Plki |
|-------------|---------|-------|-------|-------------|------------------------|-------|-------|-------------|
| AurkB       | 6.258   | 8.890 | 6.065 | 7.568       | AurkB                  | 0.161 | 1.143 | 0.403       |
| CCNB1       | 5.198   | 6.779 | 4.085 | 4.458       | CCNB1                  | 0.334 | 2.163 | 1.670       |
| CCND1       | 3.758   | 7.956 | 3.867 | 6.853       | CCND1                  | 0.054 | 0.927 | 0.117       |
| CCNE1       | 8.460   | 8.061 | 9.337 | 8.381       | CCNE1                  | 1.318 | 0.545 | 1.057       |
| CDKN1A      | 5.323   | 4.150 | 5.125 | 4.686       | CDKN1A                 | 2.254 | 1.147 | 1.555       |

|        |       |        |       |        |        |       |       |       |
|--------|-------|--------|-------|--------|--------|-------|-------|-------|
| E2F1   | 6.880 | 10.259 | 7.850 | 8.658  | E2F1   | 0.096 | 0.511 | 0.292 |
| MAP2K1 | 5.648 | 5.686  | 5.877 | 5.303  | MAP2K1 | 0.974 | 0.853 | 1.270 |
| MAP2K2 | 4.500 | 4.344  | 4.730 | 4.418  | MAP2K2 | 1.114 | 0.853 | 1.059 |
| MAPK1  | 3.950 | 1.751  | 3.755 | 2.231  | MAPK1  | 4.591 | 1.145 | 3.293 |
| MAPK3  | 6.615 | 5.184  | 6.210 | 5.651  | MAPK3  | 2.697 | 1.325 | 1.952 |
| MDM2   | 4.880 | 3.950  | 4.680 | 4.201  | MDM2   | 1.905 | 1.149 | 1.602 |
| PLK1   | 7.093 | 9.455  | 6.374 | 7.643  | PLK1   | 0.194 | 1.646 | 0.683 |
| RB1    | 6.733 | 6.741  | 7.102 | 6.586  | RB1    | 0.994 | 0.774 | 1.107 |
| CEBPD  | 5.748 | 5.686  | 6.052 | 5.738  | CEBPD  | 1.043 | 0.810 | 1.007 |
| CDC25A | 8.568 | 12.789 | 9.170 | 10.473 | CDC25A | 0.054 | 0.659 | 0.267 |
| CHEK2  | 7.898 | 10.060 | 7.849 | 9.728  | CHEK2  | 0.223 | 1.035 | 0.281 |
| BCL2L1 | 6.328 | 4.654  | 6.017 | 5.133  | BCL2L1 | 3.191 | 1.240 | 2.289 |

## References

- Cerami, E, Gao, J, Dogrusoz, U, *et al.* (2012). The cBio cancer genomics portal: an open platform for exploring multidimensional cancer genomics data. *Cancer Discov* 2: 401–4.
- Chou, TC, Talalay, P (1984). Quantitative analysis of dose-effect relationships: the combined effects of multiple drugs or enzyme inhibitors. *Adv Enzyme Regul* 22: 27–55.
- Gao, J, Aksoy, BA, Dogrusoz, U, *et al.* (2013). Integrative analysis of complex cancer genomics and clinical profiles using the cBioPortal. *Sci Signal* 6: p11.
